# Supplementary material
Source: Springer Nature journal article supplement (https://www.springermedizin.de/resource/supplementary/12883_2013_1145_MOESM1_ESM.pdf/9456542)
Supplement: MOESM1 [file 9456542]

**151158** cases of ischaemic stroke or TIA, bleedings and other aetiologies documented in the Hesse stroke registry (2004-2010)

**134151** cases  $\geq 56$  years of age (89%)

**17007** selected cases representing young patients

**759** cases of documented subarachnoid hemorrhage  
**251** cases without specific classification (e.g. CVT)

**15997** selected cases with documented cerebrovascular event

**14522** cases of ischemic stroke  
or TIA (91%)

**1475** cases of intracerebral  
hemorrhage (9%)

**9239** cases of ischemic stroke  
(64%)

**5283** cases of TIA  
(36%)
